# Supplementary material
Source: MDPI journal article supplement (https://www.mdpi.com/2227-9091/12/3/44)
Supplement: s1 [file s1]

Archive with 1 entries (1 files):
- risks-2846113-supplementary 2.pdf
